# Supplementary material for: Highly dispersed, ultra-small and noble metal-free Cu nanodots supported on porous SiO2 and their excellent catalytic hydrogenation of dimethyl oxalate to methyl glycolate
Source: Royal Society of Chemistry journal article supplement (doi:10.1039/c8nj01627e), 2018-01-01
Supplement: c8nj01627e1.pdf [file c8nj01627e1.pdf]

**Supporting information**

**Highly dispersed, ultra-small and noble metal-free Cu nanodots supported on porous SiO<sub>2</sub> and their excellent catalytic hydrogenation of dimethyl oxalate to methyl glycolate**

Mohamed Abbas<sup>a,b,\*</sup>, Zheng Chen <sup>a,c</sup>, Juan Zhang <sup>b</sup> and Jiangang Chen<sup>b,\*</sup>

---

<sup>a</sup> State Key Laboratory of Coal Conversion, Institute of Coal Chemistry, Chinese Academy of Sciences, Taiyuan, 030001, China.

<sup>b</sup> Ceramics Department, National Research Center, 12622 El Behouth Str., Cairo, Egypt.

<sup>c</sup> University of Chinese Academy of Sciences, Beijing, China

E-mail: mohamed\_abbas83@yahoo.com, mohamed@dgist.ac.kr, chenjg@sxicc.ac.kr

---

| Ref                                              | Reaction temperature (°C) | H <sub>2</sub> /DMO Ratio mol mol <sup>-1</sup> |
|--------------------------------------------------|---------------------------|-------------------------------------------------|
| This work<br>Cu/SiO <sub>2</sub><br>(Sonochem)   | 220                       | 200                                             |
| This work<br>Cu/SiO <sub>2</sub><br>(Hydrotherm) | 210                       | 200                                             |
| 3                                                | 210                       | 300                                             |
| 6                                                | 180                       | 150                                             |
| 11                                               | 200                       | 80                                              |
| 13                                               | 80                        | 17.5                                            |
| 14                                               | 220                       | 110                                             |
| 5                                                | 220                       | 80                                              |

Table. S1. Reaction condition of the catalysts used in the comparison of the catalytic performance(Related to Table 2).

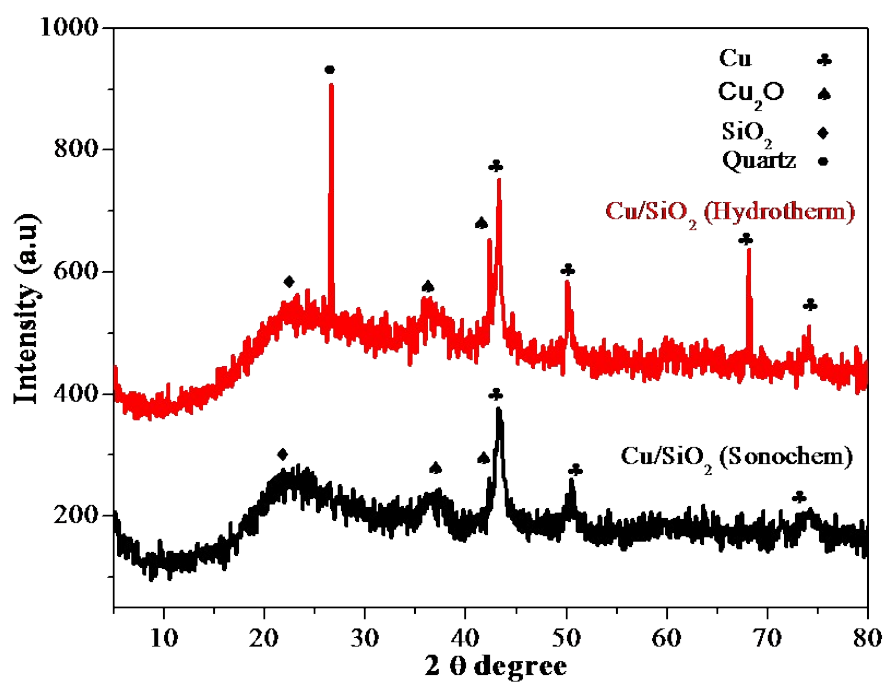

Fig. S1 XRD diffraction pattern for the spent Cu/SiO<sub>2</sub> catalyst synthesized by sonochemical and hydrothermal methods

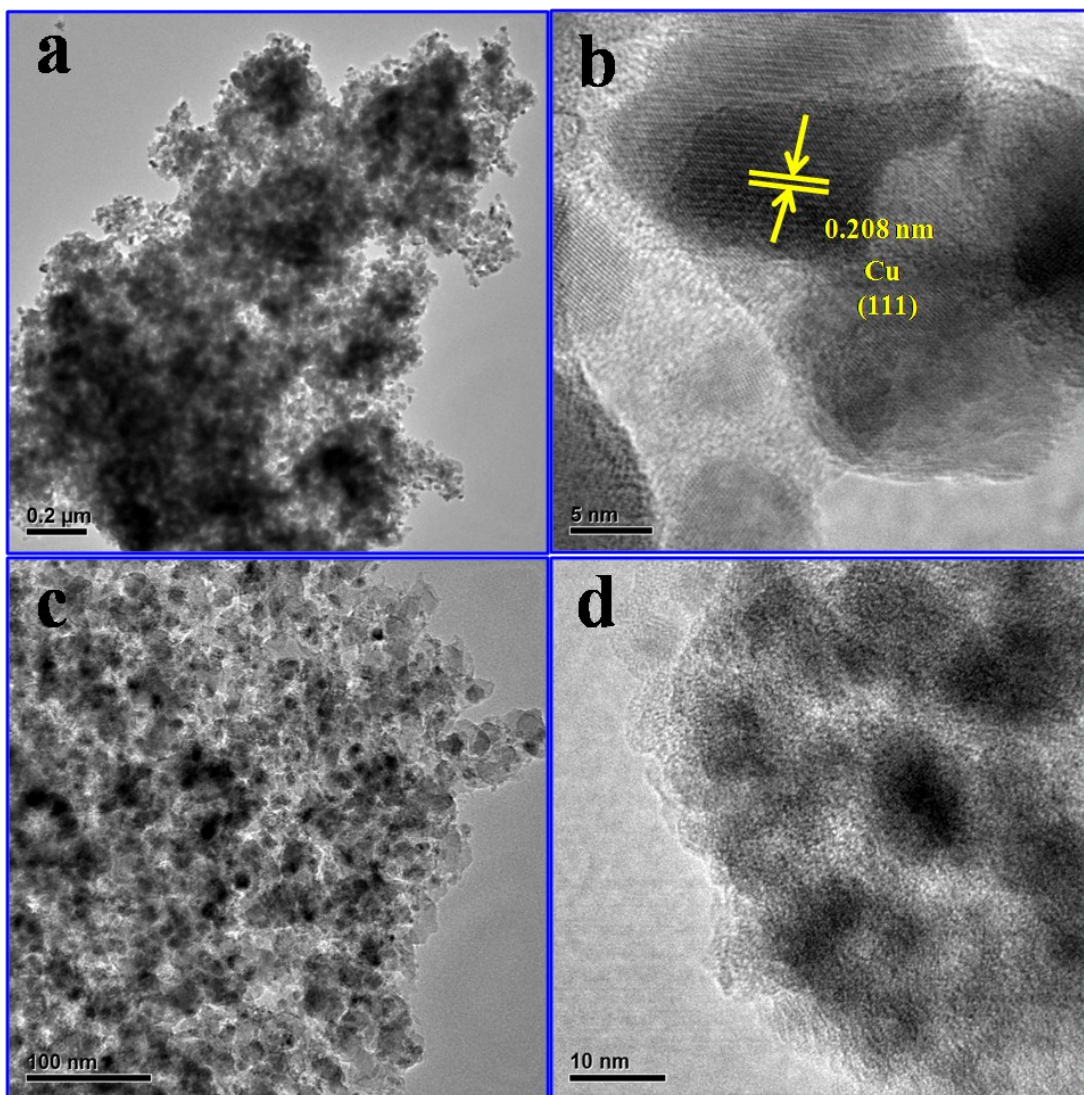

Fig. S2 TEM images of the spent Cu/SiO<sub>2</sub> catalysts synthesized by sonochemical and hydrothermal methods

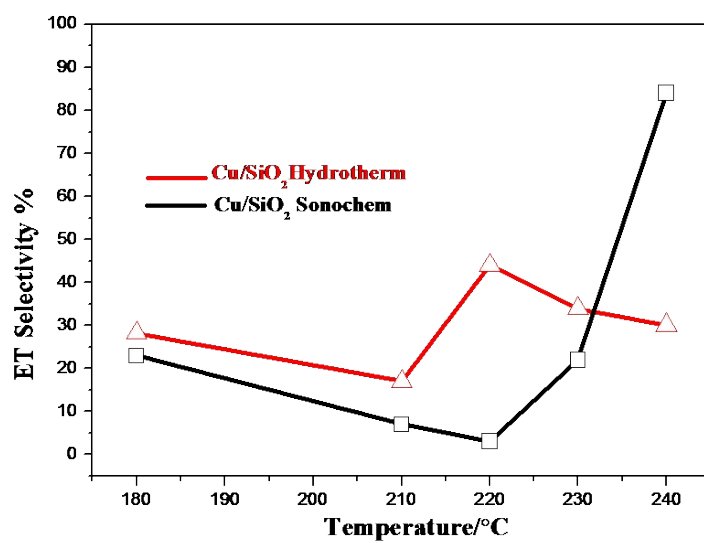

Fig. S3 ETOH selectivity for Cu/SiO<sub>2</sub> catalysts at different reaction temperatures.

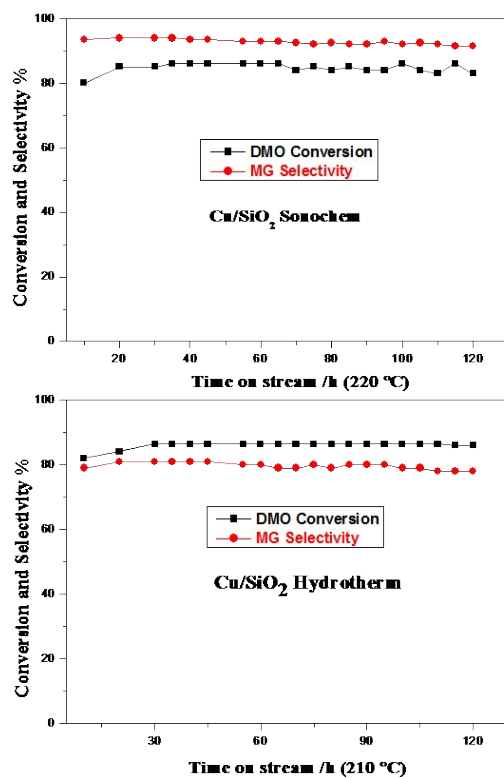

Fig. S4 Catalytic performance for Cu/SiO<sub>2</sub> catalysts at reaction condition of 2.5 MPa, H<sub>2</sub>/DMO of 200 mol mol<sup>-1</sup>, and WLHSV<sub>DMO</sub> of 0.257 g<sub>gatal</sub><sup>-1</sup> h<sup>-1</sup> for a period of 120 h.
